# Supplementary material for: Possible Roles of Carbohydrate Management and Cytokinin in the Process of Defoliation–Regrowth Cycles in Rice
Source: MDPI journal article supplement (doi:10.3390/ijms25105070), 2024-05-07
Supplement: s1 [file s1]

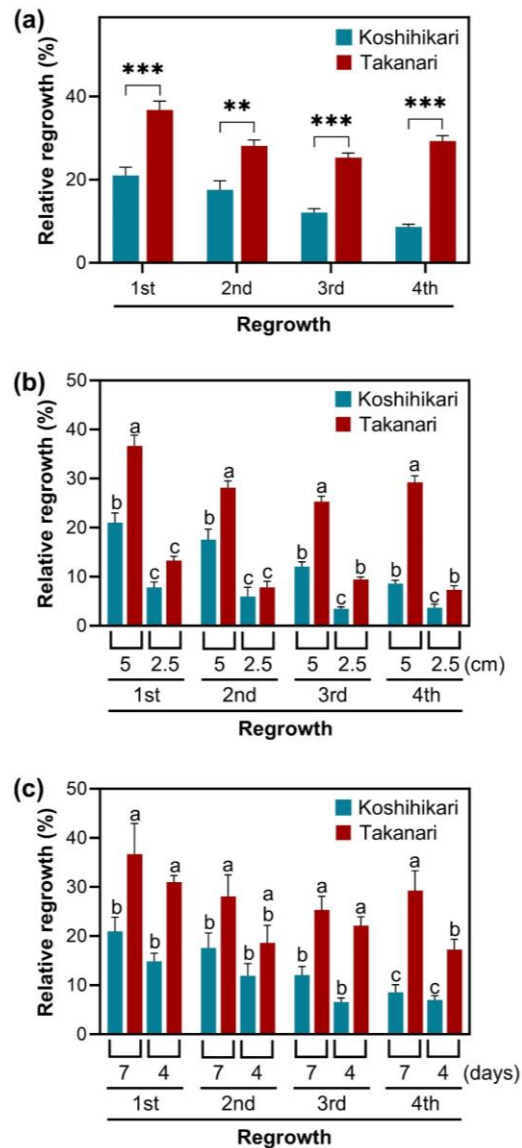

**Figure S1.** Regrowth vigor after defoliation based on leaf areas. (a) Relative regrowth of Koshihikari and Takanari after defoliation cycles. Fourteen-day-old plants were exposed to weekly clipping at 5 cm cutting height and regrown for 7 days. The defoliation-regrowth cycles were repeated four times. Relative regrowth was calculated by comparison with the total leaf area of clipped leaves at the first defoliation in each variety. The data represent means  $\pm$  SE from four replicates. Asterisks indicate significant differences between the two varieties (t-test; \*\* $P < 0.01$ , \*\*\* $P < 0.001$ ). (b) Relative regrowth of Koshihikari and Takanari after defoliation at 5 or 2.5 cm cutting height. Plants were exposed to defoliation cycles every 7 days at distinct cutting heights. (c) Relative regrowth of Koshihikari and Takanari after defoliation at a 7- or 4-day interval. Plants were exposed to defoliation cycles at 5 cm cutting height at distinct regrowth intervals. In (b) and (c), Data represent means  $\pm$  SE from four replicates. Bars not sharing the same letter significantly differ in each defoliation cycle (ANOVA followed by Tukey HSD test;  $P < 0.05$ ).

Table S1. Primer sequences and annealing temperature used for quantitative RT-PCR analysis.

|                  | Gene name                   | Gene ID                     | Forward primer          | Reverse primer           | Annealing temperature | References |
|------------------|-----------------------------|-----------------------------|-------------------------|--------------------------|-----------------------|------------|
| <i>SUS1</i>      | <i>SUCROSE SYNTHASE 1</i>   | Os03g0401300                | CATCTCAGGCTGAGACTCTGA   | CAAATTC AATCGACCTTACTT   | 52                    | [1]        |
| <i>SUS2</i>      | <i>SUCROSE SYNTHASE 2</i>   | Os06g0194900                | GAGGCTGATGACCTTGACTGG   | CCCTCCATTACTTGGATGTGCT   | 59                    | [1]        |
| <i>SUS3</i>      | <i>SUCROSE SYNTHASE 3</i>   | Os07g0616800                | GTGAGACACGCCGCTACCTGGAG | CCCTGAAATCAACTAAACCCT    | 55                    | [1]        |
| <i>SUS4</i>      | <i>SUCROSE SYNTHASE 4</i>   | Os03g0340500                | TGAACTGGCGAAGACTGTACC   | CAATGGCAATGAAGCACTGAG    | 57                    | [1]        |
| <i>SUS5/SUS7</i> | <i>SUCROSE SYNTHASE 5/7</i> | Os04g0309600 / Os04g0249500 | CAGGTTAGCCGGGCAGAAG     | CATTGTACACAAATCTCACGCAAG | 57                    | [1]        |
| <i>SUS6</i>      | <i>SUCROSE SYNTHASE 6</i>   | Os02g0831500                | CGAACAACCAGCACAACCTAC   | GGAGCAGTGGTCCAAGTAAG     | 57                    | [1]        |
| <i>AMY1C</i>     | $\alpha$ -AMYLASE 1C        | Os02g0765400                | TATCATGGAGGCTGACAGCG    | GCTAATTGTGCCTCTCCACC     | 58                    | [2]        |
| <i>AMY2A</i>     | $\alpha$ -AMYLASE 2A        | Os06g0713800                | GCCGATCATCGCACCTCTTC    | CGATCCCACATATCAGTGACG    | 57                    | [2]        |
| <i>AMY3A</i>     | $\alpha$ -AMYLASE 3A        | Os09g0457400                | GAGGGTCATACCAAGATCG     | TGTGTAGCTAGCTTGCGAGC     | 57                    | [2]        |
| <i>AMY3C</i>     | $\alpha$ -AMYLASE 3C        | Os09g0457800                | TCCATGTCGTTGCTCACGGC    | CGCCCTGCTGGAAGCTAAGAC    | 61                    | [3]        |
| <i>AMY3D</i>     | $\alpha$ -AMYLASE 3D        | Os08g0473900                | CGGGATAGTCATGCTCAAAC    | ACGCTACAATCGGATACAAAA    | 55                    | [4]        |
| <i>AMY4A</i>     | $\alpha$ -AMYLASE 4A        | Os01g0715400                | TCGCCTGAAGGATACATGCC    | GATTCAGGACGGCATCACCA     | 59                    | [2]        |
| <i>AMY5A</i>     | $\alpha$ -AMYLASE 5A        | Os04g0403300                | TCAGGGTCATTGGCCATTCC    | TGGGGATGCCAGGATGAGTA     | 59                    | [2]        |
| <i>ACT1</i>      | <i>ACTIN 1</i>              | Os03g0718100                | CCGAGCGGGAAATTGTGAG     | CTATGAAGGAAGGCTGGAAGAGG  | 58                    | [4]        |
| <i>UBQ1</i>      | <i>UBIQUITIN 1</i>          | Os06g0681400                | CAGTAAGTCCTCAGCCAT      | AGACCAGACAACCATAGC       | 53                    | [1]        |

1. Fan, C.; Wang, G.; Wang, Y.; Zhang, R.; Wang, Y.; Feng, S.; Luo, K.; Peng, L. Sucrose synthase enhances hull size and grain weight by regulating cell division and starch accumulation in transgenic rice. *Int. J. Mol. Sci.* **2019**, *20*, 4971.
2. Liu, X.; Luo, J.; Li, T.; Yang, H.; Wang, P.; Su, L.; Zheng, Y.; Bao, C.; Zhou, C. *SDG711* is involved in rice seed development through regulation of starch metabolism gene expression in coordination with other histone modifications. *Rice* **2021**, *14*, 25.
3. Sugimura, Y.; Michiyama, H.; Hirano, T. Involvement of  $\alpha$ -amylase genes in starch degradation in rice leaf sheaths at the post-heading stage. *Plant Prod. Sci.* **2015**, *18*, 277-283.
4. He, Y.; Zhu, M.; Li, Z.; Jiang, S.; He, Z.; Xu, S.; Chen, X.; Hu, Z.; Zhang, Z. *IPA1* negatively regulates early rice seedling development by interfering with starch metabolism via the GA and WRKY pathways. *Int. J. Mol. Sci.* **2021**, *22*, 6605.
